# Supplementary material for: Effects of in situ CO 2 enrichment on structural characteristics, photosynthesis, and growth of the Mediterranean seagrass Posidonia oceanica
Source: Copernicus journal article supplement (doi:10.5194/bg-2015-641), 2016-01-18
Supplement: Supplementary file 1 [file bg-2015-641-supplement.pdf]

## 1 Supplementary Information

2 **Table S1.** Mean ( $\pm$ SD) temperature, salinity, oxygen, and PAR for the reference plot (ambient) and within the control and  
 3 experimental enclosures for each month before and during the acidification period.

| Month in <i>Period</i> | N<br>Samples | Temp (°C) |     |         |     |              |     | Salinity  |      |         |      |              |      | Oxygen ( $\mu\text{mol O}_2 \text{ kg}^{-1}$ ) |    |         |    |              |    | PAR (mol photons $\text{m}^{-2} \text{ d}^{-1}$ ) |           |      |         |      |              |      |
|------------------------|--------------|-----------|-----|---------|-----|--------------|-----|-----------|------|---------|------|--------------|------|------------------------------------------------|----|---------|----|--------------|----|---------------------------------------------------|-----------|------|---------|------|--------------|------|
|                        |              | Reference |     | Control |     | Experimental |     | Reference |      | Control |      | Experimental |      | Reference                                      |    | Control |    | Experimental |    | n<br>days                                         | Reference |      | Control |      | Experimental |      |
|                        |              | Mean      | SD  | Mean    | SD  | Mean         | SD  | Mean      | SD   | Mean    | SD   | Mean         | SD   | Mean                                           | SD | Mean    | SD | Mean         | SD |                                                   | Mean      | SD   | Mean    | SD   | Mean         | SD   |
| <i>Before</i>          |              |           |     |         |     |              |     |           |      |         |      |              |      |                                                |    |         |    |              |    |                                                   |           |      |         |      |              |      |
| May                    | 11840        | 17.7      | 0.5 | 17.8    | 0.4 | 17.8         | 0.4 | 37.76     | 0.06 | 37.72   | 0.06 | 37.76        | 0.06 | 254                                            | 14 | 250     | 27 | 251          | 29 | 8-12                                              | 5.36      | 2.27 | 6.13    | 2.25 | 5.41         | 1.64 |
| June                   | 8119         | 18.7      | 0.7 | 18.7    | 0.7 | 18.7         | 0.7 | 37.81     | 0.04 | 37.77   | 0.04 | 37.80        | 0.04 | 266                                            | 21 | 266     | 31 | 270          | 34 | 9-10                                              | 7.70      | 0.65 | 7.27    | 0.88 | 6.22         | 0.71 |
| <i>Acidification</i>   |              |           |     |         |     |              |     |           |      |         |      |              |      |                                                |    |         |    |              |    |                                                   |           |      |         |      |              |      |
| June                   | 6226         | 22.0      | 0.5 | 22.0    | 0.5 | 22.1         | 0.5 | 37.90     | 0.03 | 37.85   | 0.04 | 37.89        | 0.03 | 246                                            | 21 | 246     | 33 | 248          | 33 | 6                                                 | 4.65      | 3.25 | 6.75    | 1.55 | 6.15         | 1.25 |
| July                   | 21007        | 22.9      | 0.5 | 23.0    | 0.5 | 23.0         | 0.5 | 37.89     | 0.04 | 37.84   | 0.04 | 37.91        | 0.05 | 231                                            | 18 | 233     | 33 | 233          | 34 | 24-25                                             | 6.15      | 1.47 | 6.21    | 1.28 | 4.99         | 1.40 |
| August                 | 22682        | 24.1      | 0.7 | 24.2    | 0.7 | 24.2         | 0.7 | 37.93     | 0.03 | 37.89   | 0.03 | 37.99        | 0.03 | 216                                            | 16 | 212     | 28 | 215          | 30 | 26-28                                             | 5.63      | 0.72 | 5.87    | 0.90 | 5.36         | 0.79 |
| September              | 21854        | 23.2      | 0.4 | 23.2    | 0.4 | 23.3         | 0.3 | 37.98     | 0.06 | 38.03   | 0.13 | 38.09        | 0.09 | 210                                            | 14 | 206     | 23 | 205          | 23 | 25-26                                             | 4.37      | 1.27 | 4.23    | 1.39 | 4.11         | 1.12 |
| October                | 22420        | 22.5      | 0.6 | 22.5    | 0.6 | 22.5         | 0.6 | 37.93     | 0.11 | 38.09   | 0.03 | 38.16        | 0.04 | 205                                            | 9  | 197     | 13 | 195          | 17 | 28                                                | 2.55      | 0.63 | 2.07    | 0.51 | 1.95         | 0.48 |
| November               | 5377         | 20.5      | 0.4 | 20.6    | 0.5 | 20.5         | 0.5 | 37.90     | 0.11 | 38.03   | 0.07 | 37.64        | 0.08 | 211                                            | 6  | 198     | 13 | 193          | 33 | 5                                                 | 1.78      | 1.03 | 1.30    | 0.84 | 1.40         | 0.93 |
| Before                 | 24334        | 18.5      | 1.2 | 18.5    | 1.1 | 18.1         | 1.1 | 37.79     | 0.06 | 37.75   | 0.06 | 37.79        | 0.06 | 258                                            | 19 | 254     | 31 | 258          | 32 | 20-27                                             | 6.61      | 1.84 | 6.45    | 2.09 | 5.61         | 1.47 |
| Acidification          | 95711        | 23.1      | 0.9 | 23.1    | 0.9 | 23.1         | 0.9 | 37.93     | 0.06 | 37.96   | 0.13 | 38.02        | 0.12 | 217                                            | 19 | 213     | 30 | 213          | 32 | 113-116                                           | 4.56      | 1.85 | 4.60    | 2.07 | 4.11         | 1.73 |

4 **Table S2.** Statistical results from a two-way ANOVA with repeated measures and a two-way  
5 permutational MANOVA examining for changes in the benthic macrophyte structure. Pairwise  
6 comparisons are included when a significant main effect was found (\*,  $P < 0.05$ ). NS refers to no  
7 significant pairwise results ( $P > 0.05$ ) and treatments are referred to by R, C, and E for reference,  
8 control, and experimental, respectively.

| <b>Change in shoot density</b> | <b>RM-Two-way ANOVA</b>     |            |               | <b>Pairwise comparisons</b>        |
|--------------------------------|-----------------------------|------------|---------------|------------------------------------|
|                                | df                          | F          | <i>P</i>      |                                    |
| Treatment                      | 2                           | 0.69       | 0.538         |                                    |
| Quadrat (Treatment)            | 6                           |            |               |                                    |
| Month                          | 4                           | 3.63       | 0.020*        | NS                                 |
| Treatment x Month              | 8                           | 1.17       | 0.362         |                                    |
| <b>Percent cover</b>           | <b>Permutational MANOVA</b> |            |               | <b>Pairwise comparisons</b>        |
|                                | df                          | Pseudo - F | <i>P</i> (MC) |                                    |
| Treatment                      | 2                           | 2.74       | 0.046*        | $E \neq C^*$ , $R = C$ , $R = E$ , |
| Month                          | 5                           | 1.35       | 0.226         |                                    |
| Treatment x Month              | 10                          | 1.02       | 0.461         |                                    |

10

11 **Table S3.** Statistical results from a two-way ANOVA (used for # of leaves per shoot after a  
 12 transformation) or permutational MANOVA (all other measures) used to test for main effects of  
 13 treatment (experimental, control, and plot), month, and an interaction for leaf biometrics. For the  
 14 permutational test, data were permuted 999 times and the reported *P*-value is the result of a  
 15 Monte-Carlo simulation.  
 16

| <b>Leaf biometric</b>                                  | <b>df</b> | <b>F/Pseudo- F</b> | <b><i>P</i> or<br/><i>P</i>(MC)</b> |
|--------------------------------------------------------|-----------|--------------------|-------------------------------------|
| Average shoot height                                   |           |                    |                                     |
| Treatment                                              | 2         | 1.19               | 0.299                               |
| Month                                                  | 7         | 41.11              | 0.001*                              |
| Treatment x Month                                      | 14        | 1.26               | 0.219                               |
| # of leaves per shoots<br>(exponential transformation) |           |                    |                                     |
| Treatment                                              | 2         | 7.44               | 0.017*                              |
| Month                                                  | 7         | 4.14               | 0.001*                              |
| Treatment x Month                                      | 14        | 1.65               | 0.069                               |
| Leaf thickness                                         |           |                    |                                     |
| Treatment                                              | 2         | 4.05               | 0.019*                              |
| Month                                                  | 3         | 14.98              | 0.001*                              |
| Treatment x Month                                      | 6         | 2.16               | 0.050*                              |
| Leaf toughness                                         |           |                    |                                     |
| Treatment                                              | 2         | 21.81              | 0.021*                              |
| Month                                                  | 2         | 3.72               | 0.001*                              |
| Treatment x Month                                      | 4         | 1.31               | 0.256                               |

17 **Table S4.** Results of pairwise comparisons for the number of leaves per shoot (Tukey's HSD pairwise  
 18 comparison) and average shoot height (permutational (999) pairwise with a Monte-Carlo simulation) when  
 19 the main effect was significant ( $P < 0.05$ ). \* indicates significance. Treatment refers to experimental or  
 20 control enclosures or reference plot.

| Leaf biometric                                | Pairwise Comparison       | P or P (MC) |
|-----------------------------------------------|---------------------------|-------------|
| # of leaves per shoots ( $e^x$ )<br>Treatment | Control vs Reference      | 0.011*      |
|                                               | Control vs Experimental   | 0.323       |
|                                               | Experimental vs Reference | 0.292       |
| Month                                         | April vs May              | 1.000       |
|                                               | April vs June             | 0.662       |
|                                               | April vs July             | 0.465       |
|                                               | April vs August           | 0.816       |
|                                               | April vs September        | 0.840       |
|                                               | April vs October          | 0.009*      |
|                                               | May vs June               | 0.532       |
|                                               | May vs July               | 0.368       |
|                                               | May vs August             | 0.687       |
|                                               | May vs September          | 0.713       |
|                                               | May vs October            | 0.091       |
|                                               | June vs July              | 1.000       |
|                                               | June vs August            | 1.000       |
|                                               | June vs September         | 0.999       |
|                                               | June vs October           | 0.001*      |
|                                               | July vs August            | 1.000       |
|                                               | July vs September         | 0.988       |
|                                               | July vs October           | 0.001*      |
|                                               | August vs September       | 1.000       |
|                                               | August vs October         | 0.001*      |
| September vs October                          | 0.001*                    |             |
| Average Shoot Height<br>Month                 | April vs May              | 0.002*      |
|                                               | April vs June             | 0.001*      |
|                                               | April vs July             | 0.001*      |
|                                               | April vs August           | 0.001*      |
|                                               | April vs September        | 0.330       |
|                                               | April vs October          | 0.001*      |
|                                               | April vs November         | 0.001*      |
|                                               | May vs June               | 0.084       |
|                                               | May vs July               | 0.001*      |
|                                               | May vs August             | 0.006*      |
|                                               | May vs September          | 0.005*      |
|                                               | May vs October            | 0.001*      |
|                                               | May vs November           | 0.001*      |
|                                               | June vs July              | 0.049*      |
|                                               | June vs August            | 0.160       |
|                                               | June vs September         | 0.001*      |
|                                               | June vs October           | 0.001*      |
|                                               | June vs November          | 0.001*      |
|                                               | July vs August            | 0.918       |
|                                               | July vs September         | 0.001*      |
| July vs October                               | 0.001*                    |             |
| July vs November                              | 0.001*                    |             |
| August vs September                           | 0.001*                    |             |
| August vs October                             | 0.001*                    |             |
| August vs November                            | 0.001*                    |             |
| September vs October                          | 0.001*                    |             |
| September vs November                         | 0.001*                    |             |
| October vs November                           | 0.433                     |             |

22 **Table S5.** Results of permutational (999) pairwise comparison with a Monte-Carlo simulation  
 23 when main effect was significant ( $P < 0.05$ ) for leaf thickness and toughness. \* indicates  
 24 significance. Treatment refers to enclosures or reference plot.  
 25

| Significant terms in model | Pairwise comparison       | <i>P</i> (MC) |
|----------------------------|---------------------------|---------------|
| Leaf Thickness             |                           |               |
| Treatment                  | Control vs Reference      | 0.685         |
|                            | Control vs Experiment     | 0.046*        |
|                            | Experimental vs Reference | 0.008*        |
| Month                      | July vs September         | 0.002*        |
|                            | July vs October           | 0.897         |
|                            | July vs November          | 0.002*        |
|                            | September vs October      | 0.011*        |
|                            | September vs November     | 0.001*        |
|                            | October vs November       | 0.003*        |
| Treatment x Month          | <i>July</i>               |               |
|                            | Control vs Reference      | 0.051         |
|                            | Control vs Experimental   | 0.505         |
|                            | Experimental vs Reference | 0.289         |
|                            | <i>September</i>          |               |
|                            | Control vs Reference      | 0.433         |
|                            | Control vs Experimental   | 0.246         |
|                            | Experimental vs Reference | 0.698         |
|                            | <i>October</i>            |               |
|                            | Control vs Reference      | 0.893         |
|                            | Control vs Experimental   | 0.571         |
|                            | Experimental vs Reference | 0.687         |
|                            | <i>November</i>           |               |
|                            | Control vs Reference      | 0.17          |
|                            | Control vs Experimental   | 0.002*        |
| Reference vs Experimental  | 0.001*                    |               |
| Leaf toughness             |                           |               |
| Treatment                  | Control vs Reference      | 0.018*        |
|                            | Control vs Experimental   | 0.888         |
|                            | Reference vs Experimental | 0.009*        |
| Month                      | July vs September         | 0.114         |
|                            | July vs October           | 0.001*        |
|                            | September vs October      | 0.001*        |

26 .

27 **Table S6.** Statistical results examining for differences in photo-physiology and respiration by month and  
 28 treatment (experimental, control, or reference). \* indicates significance ( $P < 0.05$ )  
 29

| <b>Fluorescence Measure</b>                    | <b>df</b> | <b>F</b>         | <b>P</b> |
|------------------------------------------------|-----------|------------------|----------|
| Dark adapted yield ( $F_v/F_m$ )               |           |                  |          |
| Treatment                                      | 2         | 1.54             | 0.224    |
| Month                                          | 3         | 18.74            | 0.001*   |
| Treatment x Month                              | 6         | 1.92             | 0.093    |
| Alpha                                          |           |                  |          |
| Treatment                                      | 2         | 0.59             | 0.559    |
| Month                                          | 3         | 44.56            | 0.001*   |
| Treatment x Month                              | 6         | 0.77             | 0.602    |
| $rETR_{max}$                                   |           |                  |          |
| Treatment                                      | 2         | 1.35             | 0.268    |
| Month                                          | 3         | 82.98            | 0.001*   |
| Treatment x Month                              | 6         | 0.10             | 0.996    |
| $E_k$                                          |           |                  |          |
| Treatment                                      | 2         | 1.03             | 0.364    |
| Month                                          | 3         | 32.16            | 0.001*   |
| Treatment x Month                              | 6         | 0.24             | 0.961    |
| <hr/>                                          |           |                  |          |
| <b>Photosynthesis vs. Irradiance Parameter</b> | <b>df</b> | <b>F</b>         | <b>P</b> |
| Alpha (rank)                                   |           |                  |          |
| Treatment                                      | 1         | 1.14             | 0.309    |
| Month                                          | 1         | 11.15            | 0.007*   |
| Treatment x Month                              | 1         | 0.85             | 0.376    |
| $P_{g\ max}$ (log)                             |           |                  |          |
| Treatment                                      | 1         | 0.03             | 0.858    |
| Month                                          | 1         | 10.84            | 0.007*   |
| Treatment x Month                              | 1         | 0.50             | 0.492    |
| $I_k$                                          |           |                  |          |
| Treatment                                      | 1         | 0.62             | 0.450    |
| Month                                          | 1         | 0.69             | 0.426    |
| Treatment x Month                              | 1         | 0.02             | 0.896    |
| Respiration                                    |           |                  |          |
| Treatment                                      | 1         | 1.70             | 0.219    |
| Month                                          | 1         | 39.70            | 0.001*   |
| Treatment x Month                              | 1         | 0.66             | 0.435    |
| $I_c$                                          |           |                  |          |
| Treatment                                      | 1         | 0.10             | 0.758    |
| Month                                          | 1         | 4.70             | 0.053    |
| Treatment x Month                              | 1         | 0.11             | 0.746    |
| <hr/>                                          |           |                  |          |
| <b>Pigment Analysis</b>                        | <b>df</b> | <b>F/t-value</b> | <b>P</b> |
| Total chlorophyll                              |           |                  |          |
| Treatment                                      | 1         | 0.08             | 0.783    |
| Month                                          | 1         | 9.43             | 0.008*   |
| Treatment x Month                              | 1         | 2.92             | 0.110    |
| Chl a:b                                        |           |                  |          |
| September (T-test)                             | 6         | -0.30            | 0.774    |
| November (Mann-Whitney U)                      | 6         | 26.00            | 0.476    |

30 **Table S7.** Statistical results for growth and biomass. Tukey's HSD post hoc pairwise results are  
 31 included when main effects were significant (\*,  $P < 0.05$ ). Treatments are referred to by E, C, and  
 32 R for experimental, control, and reference, respectively. Months are abbreviated.

| <b>Growth estimate</b> | <b>df</b> | <b>F</b> | <b>P</b> | <b>Pairwise comparisons</b>     |
|------------------------|-----------|----------|----------|---------------------------------|
| Plastochrone Interval  |           |          |          |                                 |
| Treatment              | 2         | 9.68     | 0.001*   | E = C, R<E*, R<C*               |
| Month                  | 1         | 0.50     | 0.483    |                                 |
| Treatment x Month      | 2         | 0.37     | 0.694    |                                 |
| Leaf production        |           |          |          |                                 |
| Treatment              | 2         | 5.24     | 0.009*   | E= C, R>E*, R>C*                |
| Month                  | 2         | 21.57    | 0.001*   | Aug = Sept, Oct>Aug*, Oct>Sept* |
| Treatment x Month      | 4         | 2.03     | 0.107    |                                 |
| Above-ground biomass   |           |          |          |                                 |
| Treatment              | 3         | 1.67     | 0.226    |                                 |
| Below-ground biomass   |           |          |          |                                 |
| Treatment              | 3         | 0.40     | 0.757    |                                 |
